# Supplementary material
Source: ML conference proceedings conference paper supplement (https://openreview.net/forum?id=eVlcdbIx2O)
Supplement: supplementary_material [file attachment]

## A PROOF

### A.1 PROOF OF THEOREM 4.2

*Proof.* We define a mapping  $\Gamma : \Pi \rightarrow \Pi$  such that  $\pi_{n+1} = \Gamma(\pi_n)$  satisfies that  $P_T(x_T, \pi_{n+1}^i, \pi_n^{-i}) \propto R^i(x_T; \pi_{n+1}^i, \pi_n^{-i})$ , where  $\Pi$  is the joint policy space of  $\pi$ . From Brouwer Fixed Points Theorem, there exists a profile  $\pi^* = \Gamma(\pi^*)$ . From the definition of FE,  $\pi^*$  is an FE.  $\square$

### A.2 PROOF OF THEOREM 4.3

Before the proof, we introduce a Lemma (Guo et al., 2019).

**Lemma A.1.** Define the two distribution over vector  $\mathbf{x} = (x_1, x_2, \dots, x_n)$  where  $x_1 = x_2 = \dots = x_m = x_{\max} \geq \max_{i > m} x_i$ :  $\text{softmax}_c(\mathbf{x})_i = \frac{e^{cx_i}}{\sum_j e^{cx_j}}$  and  $\text{argmax-e}(\mathbf{x})_i = \begin{cases} \frac{1}{m}, & i \leq m, \\ 0, & \text{otherwise.} \end{cases}$  The distance between  $\text{softmax}_c$  and  $\text{argmax-e}$  is bounded by

$$\|\text{softmax}_1(\mathbf{x}) - \text{argmax-e}(\mathbf{x})\|_1 \leq 2n \exp(-c\delta), \quad (15)$$

where  $\delta = x_{\max} - \max_{x_j < x_{\max}} x_j$  and  $\delta := \infty$  when all  $x_j$  are equal.

*Proof.* Without loss of generality, assume that  $\log R^i(x_T^1) = \log R^i(x_T^2) = \dots = \log R^i(x_T^m) = \max_k \log R^i(x_T^k) := R_{\max}$ . We denote  $\mathbf{x}_T = (x_T^1, x_T^2, \dots, x_T^{|\mathcal{X}|})$ . Given the opponent policy  $\pi^{-i}$ , the expected cumulative reward of the best response for agent  $i$  equals to  $\langle \text{argmax-e}(\log R^i(\mathbf{x}_T)), \log R^i(\mathbf{x}_T) \rangle$  and  $\langle \text{softmax}_1(\log R^i(\mathbf{x}_T)), \log R^i(\mathbf{x}_T) \rangle$ . The exploitability of agent  $i$  is

$$\begin{aligned} & |\langle \text{argmax-e}(\log R^i(\mathbf{x}_T)), \log R^i(\mathbf{x}_T) \rangle - \langle \text{softmax}_1(\log R^i(\mathbf{x}_T)), \log R^i(\mathbf{x}_T) \rangle| \\ & \leq \text{Ret}_{\max} \|\text{softmax}_1(\log R^i(\mathbf{x}_T)) - \text{argmax-e}(\log R^i(\mathbf{x}_T))\|_1 = 2|\mathcal{X}|e^{-\delta} \end{aligned} \quad (16)$$

$\square$

### A.3 PROOF OF PROPOSITION 5.1

*Proof.* We first define the discounted state visitation distribution  $d^\pi(s) = (1 - \gamma) \sum_{t=0}^{\infty} \gamma^t P(s_t = s)$ . Denote  $\theta_i^{(t)}$  is the parameter vector of policy  $\pi^{i,(t)}$ . And the element of  $\theta^{(t)}$  is the approximation of action-value function, i.e.  $\theta_{i,s,a,a^{-i}}^{(t)} = Q^i(s, a, a^{-i}; \pi^{(t)})$ . From (Cen et al., 2022), the update rule of  $\theta$  is

$$\begin{aligned} \theta_{i,s,a,a^{-i}}^{(t+1)} &= \theta_{i,s,a,a^{-i}}^{(t)} + \eta \left[ \mathcal{F}(\theta_i^{(t)})^\dagger V^i(s; \pi^{(t)}) \right] \\ &= \theta_{i,s,a,a^{-i}}^{(t)} + \frac{\eta}{1 - \gamma} \left( Q^i(s, a, a^{-i}; \pi^{(t)}) - \log \pi(a|s, a^{-i}) \rho(a^{-i}|s) - V^i(s; \pi^{(t)}) \right), \end{aligned}$$

where  $\mathcal{F}(\theta_i^{(t)})^\dagger$  is the pseudo-inverse of the Fischer information matrix

$$\mathcal{F}(\theta_i^{(t)}) = \mathbb{E}_{s \sim d^{\pi^{(t)}}(\cdot), a^{-i} \sim \rho(\cdot|s), a^i \sim \pi^{i,(t)}(\cdot|a^{-i}, s) \sim} \left[ \nabla_{\theta_i^{(t)}} \log \pi^{i,(t)}(a^i|s, a^{-i}) \log \pi^{i,(t)}(a^i|s, a^{-i})^T \right].$$

Hence the update rule of policy is

$$\begin{aligned} \pi^{i,(t+1)}(a|s, a^{-i}) &\propto \exp(\theta_{i,s,a,a^{-i}}^{(t+1)}) \\ &= \exp \left( \theta_{i,s,a,a^{-i}}^{(t)} + \frac{\eta}{1 - \gamma} \left( Q^i(s, a, a^{-i}; \pi^{(t)}) - \log \pi(a|s, a^{-i}) \rho(a^{-i}|s) - V^i(s; \pi^{(t)}) \right) \right) \\ &\propto \left( \pi^{i,(t)}(a|s, a^{-i}) \right)^{1 - \frac{\eta}{1 - \gamma}} \exp \left( \frac{\eta}{1 - \gamma} Q^i(s, a, a^{-i}; \pi^{(t)}) \right). \end{aligned}$$

$\square$

## A.4 PROOF OF PROPOSITION 4.6

*Proof.* From Pinsker's inequality,  $D_{TV}(\rho(\cdot|s), \pi^{-i}(\cdot|s)) \leq \sqrt{\frac{1}{2}\text{KL}(\rho(\cdot|s)||\pi^{-i}(\cdot|s))} \leq \sqrt{\frac{1}{2}\epsilon_\rho}$ .

Denote the value function derived using the opponent model as  $\hat{V}^i(s; \pi)$ . Define  $P_\rho^\pi(s'|s) := \mathbb{E}_{a^{-i} \sim \rho(\cdot|s)}[\sum_{a \in \mathcal{A}^i} P(s'|s, a, a^{-i})\pi(a|s, a^{-i})]$ .

$$\begin{aligned}
& |V^i(s; \pi) - \hat{V}^i(s; \pi)| \\
& \leq 2(1 + \log |\mathcal{A}_i|)D_{TV}(\rho(\cdot|s), \pi^{-i}(\cdot|s)) + \gamma|\mathbb{E}_{s' \sim P_\rho^\pi(s'|s)}V^i(s'; \pi) - \mathbb{E}_{s' \sim P_{\pi^{-i}}^\pi(s'|s)}V^i(s'; \pi)| \\
& \quad + \gamma|\mathbb{E}_{s' \sim P_\rho^\pi(s'|s)}[V^i(s'; \pi) - \hat{V}^i(s'; \pi)] - \text{KL}(\rho(\cdot|s)||\pi^{-i}(\cdot|s))| \\
& \leq 2(1 + \log |\mathcal{A}_i|)D_{TV}(\rho(\cdot|s), \pi^{-i}(\cdot|s)) + 2\gamma(\max_{s' \in \mathcal{S}} V^i(s'; \pi))D_{TV}(P_\rho^\pi(s'|s), P_{\pi^{-i}}^\pi(s'|s)) \\
& \quad + \gamma \max_{s' \sim \mathcal{S}} |V^i(s'; \pi) - \hat{V}^i(s'; \pi)| - \text{KL}(\rho(\cdot|s)||\pi^{-i}(\cdot|s)) \\
& \leq 2(1 + \log |\mathcal{A}_i| + \frac{\gamma(1 + \log |\mathcal{A}_i|)}{1 - \gamma})\sqrt{\frac{1}{2}\epsilon_\rho} + \gamma \max_{s' \sim \mathcal{S}} |V^i(s'; \pi) - \hat{V}^i(s'; \pi)| + \epsilon_\rho \\
& = \frac{2(1 + \log |\mathcal{A}_i|)}{1 - \gamma}\sqrt{\frac{1}{2}\epsilon_\rho} + \gamma \max_{s' \sim \mathcal{S}} |V^i(s'; \pi) - \hat{V}^i(s'; \pi)| + \epsilon_\rho
\end{aligned}$$

Then the estimated error of value function can be derived

$$\max_{s \sim \mathcal{S}} |V^i(s; \pi) - \hat{V}^i(s; \pi)| \leq \frac{2(1 + \log |\mathcal{A}_i|)}{(1 - \gamma)^2}\sqrt{\frac{1}{2}\epsilon_\rho} + \frac{\epsilon_\rho}{1 - \gamma}$$

Using soft Bellman equation, we have that

$$\max_{s \in \mathcal{S}, \mathbf{a} \in \mathcal{A}} |Q^i(s, \mathbf{a}; \pi) - \hat{Q}^i(s, \mathbf{a}; \pi)| \leq \delta$$

□

## A.5 PROOF OF PROPOSITION 5.3

*Proof.* We denote  $\pi^i(a|s) = \sum_{a^{-i} \in \mathcal{A}^{-i}} \pi_i^{\theta_s}(a|a^{-i}, s)\rho(a^{-i}|s)$ . Then the joint policy  $\pi^{\theta_s}(\mathbf{a}|s) = \prod_{i \in \mathcal{N}} \pi_i^{\theta_s}(a^i|s)$ . For all  $i, j \in \mathcal{N}, i \neq j$ .

$$\mathbb{E}_{\mathbf{a} \sim \pi^{\theta_s}(\cdot|s)} [\nabla_{\theta_s} \pi_i^{\theta_s}(a^i|s) \nabla_{\theta_s} \pi_j^{\theta_s}(a^j|s)^T] = \mathbb{E}_{\mathbf{a} \sim \pi^{\theta_s}(\cdot|s)} [\nabla_{\theta_s} \pi_i^{\theta_s}(a^i|s)] [\nabla_{\theta_s} \pi_j^{\theta_s}(a^j|s)^T] = 0$$

Then the Fisher matrix

$$\mathcal{F}(\theta_s) = \mathbb{E}[\nabla_{\theta_s} \log \pi^{\theta_s}(\mathbf{a}|s) \nabla_{\theta_s} \log \pi^{\theta_s}(\mathbf{a}|s)^T] = \sum_{i \in \mathcal{N}} \mathbb{E}_{a^i \sim \pi_i^{\theta_s}(a^i|s)} [\nabla_{\theta_s} \log \pi_i^{\theta_s}(a^i|s) \nabla_{\theta_s} \log \pi_i^{\theta_s}(a^i|s)^T].$$

Therefore  $\mathcal{F}(\theta_s)$  is a block-diagonal matrix, and each block is corresponding to the policy parameter of an agent. Since the pseudo-inverse of a block-diagonal matrix is block-diagonal with the pseudo-inverse of each block of the original matrix, VPG has the same dynamics as global NPG. □

## A.6 PROOF OF LEMMA 5.4

*Proof.* As the gradient of the value functions equals the potential function, we prove the smoothness of value functions. Define the  $\tilde{\Phi}^i(s, \pi) = \mathbb{E}[\sum_{t=0}^{\infty} \gamma^t r^i(s_t, \mathbf{a}_t)]$ , where the expectation is taken with respect to  $\mathbf{a}_t \sim \pi_i(\cdot|s_t)$ ,  $s_{t+1} \sim P(\cdot|s_t, \mathbf{a}_t)$ .  $n = 2$  is the number of players. The value function can be decomposed

$$\Phi(s, \pi) = \tilde{\Phi}^i(s, \pi) + \mathcal{H}(\pi) \quad (17)$$

where  $\mathcal{H}(\pi) = -\mathbb{E}[\sum_{t=0}^{\infty} \gamma^t \pi(\mathbf{a}_t|s_t) \log \pi(\mathbf{a}_t|s_t)]$ . We first bound the smoothness of  $\tilde{\Phi}^i(s, \pi)$ . Let  $\pi^\alpha := \pi^{\theta + \alpha u}$ , where  $u$  is a unit vector.

$$\left. \frac{d\pi^\alpha(\mathbf{a}|s)}{d\alpha} \right|_{\alpha=0} = \pi(\mathbf{a}|s) \sum_{i \in \mathcal{N}} \sum_{a' \in \mathcal{A}_i} u_{i,s,a',a^{-i}} (\mathbf{I}_{a'=a^i} - \pi(a'|s, a^{-i}))$$

$$\begin{aligned}
\left| \frac{d\pi^\alpha(\mathbf{a} | s)}{d\alpha} \right|_{\alpha=0} &= \left| \pi(\mathbf{a} | s) \sum_{i \in \mathcal{N}} \sum_{a' \in \mathcal{A}_i} u_{i,s,a',a^{-i}} (\mathbf{I}_{a'=a^i} - \pi^i(\cdot | s, a^{-i})) \right| \\
&\leq \pi(\mathbf{a} | s) n \left( |u_{i,s,a^i,a^{-i}}| + \sum_{i \in \mathcal{N}} \sum_{a' \in \mathcal{A}_i} |u_{i,s,a^i,a^{-i}} \pi^i(a' | s, a^{-i})| \right) \\
&\leq (n+1) \pi(\mathbf{a} | s)
\end{aligned}$$

$$\begin{aligned}
\frac{d^2 \pi^\alpha(\mathbf{a} | s)}{(d\alpha)^2} \Big|_{\alpha=0} &= \pi(\mathbf{a} | s) (u_{i,s,a^i,a^{-i}} u_{j,s,a^j,a^{-j}} - \sum_{i,j \in \mathcal{N}} \sum_{a' \in \mathcal{A}_j} u_{i,s,a^i,a^{-i}} u_{j,s,a',a^{-j}} \pi_j(a' | s, a^{-j}) \\
&\quad - \sum_{i,j \in \mathcal{N}} \sum_{a' \in \mathcal{A}_i} u_{j,s,a',a^{-i}} u_{i,s,a^j,a^{-h}} \pi^i(a' | s, a^{-i}) \\
&\quad + 2 \sum_{i,j \in \mathcal{N}} \sum_{a' \in \mathcal{A}_i} \sum_{a'' \in \mathcal{A}_j} u_{i,s,a',a^{-i}} u_{j,s,a'',a^{-j}} \pi^i(a' | s, a^{-i}) \pi_j(a'' | s, a^{-j}) \\
&\quad + \sum_{i \in \mathcal{N}} \sum_{a' \in \mathcal{A}_i} u_{i,s,a',a^{-i}}^2 \pi^i(a' | s, a^{-i}))
\end{aligned} \tag{18}$$

$$\begin{aligned}
\left| \frac{d^2 \pi^\alpha(\mathbf{a} | s')}{(d\alpha)^2} \right|_{\alpha=0} &\leq \pi(\mathbf{a} | s) (u_{i,s,a^i,a^{-i}} u_{j,s,a^j,a^{-j}} + \left| \sum_{i,j \in \mathcal{N}} \sum_{a' \in \mathcal{A}_j} u_{i,s,a^i,a^{-i}} u_{j,s,a',a^{-j}} \pi_j(a' | s, a^{-j}) \right| \\
&\quad + \left| \sum_{i,j \in \mathcal{N}} \sum_{a' \in \mathcal{A}_i} u_{j,s,a',a^{-i}} u_{i,s,a^j,a^{-h}} \pi^i(a' | s, a^{-i}) \right| \\
&\quad + 2 \left| \sum_{i,j \in \mathcal{N}} \sum_{a' \in \mathcal{A}_i} \sum_{a'' \in \mathcal{A}_j} u_{i,s,a',a^{-i}} u_{j,s,a'',a^{-j}} \pi^i(a' | s, a^{-i}) \pi_j(a'' | s, a^{-j}) \right| \\
&\quad + \left| \sum_{i \in \mathcal{N}} \sum_{a' \in \mathcal{A}_i} u_{i,s,a',a^{-i}}^2 \pi^i(a' | s, a^{-i}) \right|) \\
&\leq 2(1+n+n^2) \pi(\mathbf{a} | s)
\end{aligned} \tag{19}$$

Let  $\tilde{P}(\alpha)$  be the state-action transition matrix under  $\pi$ ,

$$[\tilde{P}(\alpha)]_{(s,\mathbf{a}) \rightarrow (s',\mathbf{a}')} = \pi^\alpha(\mathbf{a}' | s') P(s' | s, \mathbf{a}).$$

We can differentiate  $\tilde{P}(\alpha)$  w.r.t  $\alpha$  to get

$$\left[ \frac{d\tilde{P}(\alpha)}{d\alpha} \right]_{\alpha=0} \Big|_{(s,\mathbf{a}) \rightarrow (s',\mathbf{a}')} = \frac{d\pi^\alpha(\mathbf{a}' | s')}{d\alpha} \Big|_{\alpha=0} P(s' | s, \mathbf{a}).$$

For an arbitrary vector  $x$ ,

$$\left[ \frac{d\tilde{P}(\alpha)}{d\alpha} \right]_{\alpha=0} \Big|_{s,\mathbf{a}} x = \sum_{\mathbf{a}',s'} \frac{d\pi^\alpha(\mathbf{a}' | s')}{d\alpha} \Big|_{\alpha=0} P(s' | s, \mathbf{a}) x_{\mathbf{a}',s'}$$

$$\begin{aligned}
\max_{\|u\|_2=1} \left| \left[ \frac{d\tilde{P}(\alpha)}{d\alpha} \right]_{\alpha=0} x \right|_{s,\mathbf{a}} &= \max_{\|u\|_2=1} \left| \sum_{\mathbf{a}',s'} \frac{d\pi^\alpha(\mathbf{a}' | s')}{d\alpha} \right|_{\alpha=0} P(s' | s, \mathbf{a}) x_{\mathbf{a}',s'} \Big| \\
&\leq \sum_{\mathbf{a}',s'} \left| \frac{d\pi^\alpha(\mathbf{a}' | s')}{d\alpha} \right|_{\alpha=0} |P(s' | s, \mathbf{a}) x_{\mathbf{a}',s'}| \\
&\leq \sum_{s'} P(s' | s, \mathbf{a}) \|x\|_\infty \sum_{\mathbf{a}'} \left| \frac{d\pi^\alpha(\mathbf{a}' | s')}{d\alpha} \right|_{\alpha=0} \\
&\leq \sum_{s'} P(s' | s, \mathbf{a}) \|x\|_\infty (n+1) \\
&\leq (n+1) \|x\|_\infty.
\end{aligned}$$

By definition of  $\ell_\infty$  norm,

$$\max_{\|u\|_2=1} \left\| \frac{d\tilde{P}(\alpha)}{d\alpha} x \right\|_\infty \leq (n+1) \|x\|_\infty$$

Similarly, we get

$$\left[ \frac{d^2 \tilde{P}(\alpha)}{(d\alpha)^2} \right]_{\alpha=0} \Big|_{(s,\mathbf{a}) \rightarrow (s',\mathbf{a}')} = \frac{d^2 \pi^\alpha(\mathbf{a}' | s')}{(d\alpha)^2} \Big|_{\alpha=0} P(s' | s, \mathbf{a}).$$

An identical argument leads to that, for arbitrary  $x$ ,

$$\max_{\|u\|_2=1} \left\| \frac{d^2 \tilde{P}(\alpha)}{(d\alpha)^2} x \right\|_\infty \leq 2(1+n+n^2) \|x\|_\infty$$

$$\max_{\|u\|_2=1} \|(I - \gamma \tilde{P}(\alpha))^{-1} x\|_\infty = \left\| \sum_{n=0}^{\infty} \gamma^n \tilde{P}(\alpha)^n x \right\|_\infty \leq \frac{1}{1-\gamma} \|x\|_\infty \quad (20)$$

Denote  $Q^i(s, \mathbf{a}; \pi^\alpha)$  as the action value function of  $\pi^\alpha$ .

$$\max_{\|u\|_2=1} \left| \frac{dQ^i(s, \mathbf{a}; \pi^\alpha)}{d\alpha} \right| = \max_{\|u\|_2=1} \gamma \left| e_{i,s,\mathbf{a}}^T (I - \gamma \tilde{P}(\alpha))^{-1} \frac{d\tilde{P}(0)}{d\alpha} (I - \gamma \tilde{P}(\alpha))^{-1} r \right| \leq \frac{\gamma(n+1)}{(1-\gamma)^2} \quad (21)$$

where  $r$  is the reward function.

$$\begin{aligned}
&\max_{\|u\|_2=1} \left| \frac{d^2 Q^i(s, \mathbf{a}; \pi^\alpha)}{d\alpha^2} \right| \\
&= \max_{\|u\|_2=1} \left| 2\gamma^2 e_{i,s,\mathbf{a}}^T (I - \gamma \tilde{P}(\alpha))^{-1} \frac{d\tilde{P}(0)}{d\alpha} (I - \gamma \tilde{P}(\alpha))^{-1} \frac{d\tilde{P}(0)}{d\alpha} (I - \gamma \tilde{P}(\alpha))^{-1} \right. \\
&\quad \left. + \gamma (I - \gamma \tilde{P}(\alpha))^{-1} \frac{d^2 \tilde{P}(0)}{d\alpha^2} (I - \gamma \tilde{P}(\alpha))^{-1} \right| \\
&\leq \max_{\|u\|_2=1} \left| 2\gamma^2 e_{i,s,\mathbf{a}}^T (I - \gamma \tilde{P}(\alpha))^{-1} \frac{d\tilde{P}(0)}{d\alpha} (I - \gamma \tilde{P}(\alpha))^{-1} \frac{d\tilde{P}(0)}{d\alpha} (I - \gamma \tilde{P}(\alpha))^{-1} \right. \\
&\quad \left. + \gamma (I - \gamma \tilde{P}(\alpha))^{-1} \frac{d^2 \tilde{P}(0)}{d\alpha^2} (I - \gamma \tilde{P}(\alpha))^{-1} \right| \\
&\leq \frac{2\gamma^2(n+1)^2}{(1-\gamma)^3} + \frac{2\gamma(1+n+n^2)}{(1-\gamma)^2}
\end{aligned} \quad (22)$$

$$\tilde{\Phi}(s, \pi^\alpha) = \sum_{\mathbf{a} \in \mathcal{A}} \pi^\alpha(\mathbf{a}|s) Q^i(s, \mathbf{a}; \pi^\alpha) \quad (23)$$

$$\begin{aligned} \left. \frac{d^2 \tilde{\Phi}(s, \pi^\alpha)}{d\alpha^2} \right|_{\alpha=0} &= \sum_{\mathbf{a} \in \mathcal{A}} \pi^\alpha(\mathbf{a}|s) \left. \frac{d^2 Q^i(s, \mathbf{a}; \pi^\alpha)}{d\alpha^2} \right|_{\alpha=0} + \sum_{\mathbf{a} \in \mathcal{A}} \left. \frac{d^2 \pi^\alpha(\mathbf{a}|s)}{d\alpha^2} \right|_{\alpha=0} Q^i(s, \mathbf{a}; \pi^\alpha) \\ &\quad + 2 \sum_{\mathbf{a} \in \mathcal{A}} \left. \frac{d\pi^\alpha(\mathbf{a}|s)}{d\alpha} \right|_{\alpha=0} \left. \frac{dQ^i(s, \mathbf{a}; \pi^\alpha)}{d\alpha} \right|_{\alpha=0} \end{aligned} \quad (24)$$

$$\begin{aligned} \left| \left. \frac{d^2 \tilde{\Phi}(s, \pi^\alpha)}{d\alpha^2} \right|_{\alpha=0} \right| &\leq \left| \sum_{\mathbf{a} \in \mathcal{A}} \pi^\alpha(\mathbf{a}|s) \left. \frac{d^2 Q^i(s, \mathbf{a}; \pi^\alpha)}{d\alpha^2} \right|_{\alpha=0} \right| + \left| \sum_{\mathbf{a} \in \mathcal{A}} \left. \frac{d^2 \pi^\alpha(\mathbf{a}|s)}{d\alpha^2} \right|_{\alpha=0} Q^i(s, \mathbf{a}; \pi^\alpha) \right| \\ &\quad + 2 \left| \sum_{\mathbf{a} \in \mathcal{A}} \left. \frac{d\pi^\alpha(\mathbf{a}|s)}{d\alpha} \right|_{\alpha=0} \left| \left. \frac{dQ^i(s, \mathbf{a}; \pi^\alpha)}{d\alpha} \right|_{\alpha=0} \right| \right| \\ &\leq \frac{2\gamma^2(n+1)^2}{(1-\gamma)^3} + \frac{2\gamma(1+n+n^2)}{(1-\gamma)^2} + \frac{2(1+n+n^2)}{1-\gamma} + \frac{2\gamma(n+1)^2}{(1-\gamma)^2} \\ &< \frac{2(n+1)^2}{(1-\gamma)^3} \end{aligned} \quad (25)$$

The second step is to bound the smoothness of  $\mathcal{H}(\pi)$ .

$$-(\pi^\alpha)^T \log \pi^\alpha = -(\pi^\alpha)^T (\theta + \alpha u) + n \log \sum_{\mathbf{a} \in \mathcal{A}} \exp(\theta + \alpha u) \quad (26)$$

$$\begin{aligned} \left| -\frac{d^2(\pi^\alpha)^T \log \pi^\alpha}{d\alpha^2} \right|_{\alpha=0} &\leq \sum_{\mathbf{a} \in \mathcal{A}} \left| \left. \frac{d^2 \pi^\alpha(\mathbf{a}|s)}{d\alpha^2} \right|_{\alpha=0} \theta \right| + 2 \sum_{\mathbf{a} \in \mathcal{A}} \left| \left. \frac{d\pi^\alpha(\mathbf{a}|s)}{d\alpha} \right|_{\alpha=0} \right| |u| \\ &\quad + n \max_{i \in \mathcal{N}} |1^T \text{diag}(\pi^i \odot u) - \pi^i(\pi^i \odot u)^T| \\ &\leq 2(n^2 + n + 1) \frac{1 + \log \max_{i \in \mathcal{N}} |A_i|}{1-\gamma} + 3n + 2 \end{aligned} \quad (27)$$

$$\begin{aligned} \left| \left. \frac{d^2 \mathcal{H}(\pi^\alpha)}{d\alpha^2} \right|_{\alpha=0} \right| &= \left| -\frac{d^2}{d\alpha^2} \mathbb{E} \left[ \sum_{t=0}^{\infty} \gamma^t \pi^\alpha(\mathbf{a}_t | s_t) \log \pi^\alpha(\mathbf{a}_t | s_t) \right] \right|_{\alpha=0} \\ &\leq \frac{1}{1-\gamma} \left\| \frac{d^2(\pi^\alpha)^T \log \pi^\alpha}{d\alpha^2} \right\|_{\infty} \\ &\leq 2(n^2 + n + 1) \frac{1 + \log \max_{i \in \mathcal{N}} |A_i|}{(1-\gamma)^2} + \frac{3n+2}{1-\gamma} := c \end{aligned} \quad (28)$$

Therefore the potential function is  $(\frac{2(n+1)^2}{(1-\gamma)^3} + c)$ -smooth.  $\square$

#### A.7 PROOF OF THEOREM 5.5

*Proof.* Since  $\Phi$  is bounded, the monotone sequence  $\{\Phi^{(t)}\}_{t=0}^{\infty}$  converges to fixed point. We denote  $\pi^* = \lim_{t \rightarrow \infty} \pi^{(t)}$ . Assume that  $\tilde{\pi}$  is a Nash equilibrium policy. We first derive the performance difference between  $\tilde{\pi}$  and  $\pi^*$ .

$$\begin{aligned} \tilde{\Phi}(s; \tilde{\pi}) - \tilde{\Phi}(s; \pi^*) &= \tilde{\Phi}(s; \tilde{\pi}) - \Phi(s; \tilde{\pi}) + \Phi(s; \tilde{\pi}) - \Phi(s; \pi^*) + \Phi(s; \pi^*) - \tilde{\Phi}(s; \pi^*) \\ &\leq \Phi(s; \pi^*) - \tilde{\Phi}(s; \pi^*) \leq \frac{\log |A|}{1-\gamma} \end{aligned} \quad (29)$$

Note that opponent modelling will introduce extra estimation error. We denote the potential function derived by opponent modelling as  $\hat{\Phi}$ . And the policy derived using opponent modelling is  $\hat{\pi}^*$ .

$$\begin{aligned} \|\Phi(\cdot; \pi^*) - \Phi(\cdot; \hat{\pi}^*)\|_\infty &= \|\Phi(\cdot; \pi^*) - \hat{\Phi}(\cdot; \pi^*) + \hat{\Phi}(\cdot; \pi^*) - \hat{\Phi}(\cdot; \hat{\pi}^*) + \hat{\Phi}(\cdot; \hat{\pi}^*) - \Phi(\cdot; \hat{\pi}^*)\|_\infty \\ &\leq \|\hat{Q}^i(s, \mathbf{a}; \pi^*) - Q^i(s, \mathbf{a}; \pi^*)\|_\infty \leq \delta \end{aligned} \quad (30)$$

Therefore the performance difference is  $\delta + \frac{\log |A|}{1-\gamma}$ .  $\square$

#### A.8 PROOF OF PROPOSITION 4.7

*Proof.*

$$\begin{aligned} &\mathbb{E}_{\mathbf{a}_0: \infty, s_0: \infty \sim q} \left[ \sum_{t=0}^{\infty} r^{-i}(s_t, \mathbf{a}_t) - \text{KL}(\rho^{-i}(a_t^{-i}|s_t) || \hat{\pi}^{-i}(\mathbf{a}_t^{-i}|s_t)) - \text{KL}(q(a_t^i|s_t) || \pi^i(a_t^i|s_t)) \right] q \\ &= \mathbb{E}_{\mathbf{a}_0, s_0 \sim q} \left[ Q_\rho^{-i}(s_0, \mathbf{a}_0; \rho) - \text{KL}(\rho^{-i}(\mathbf{a}_0^{-i}|s_0) || \hat{\pi}^{-i}(\mathbf{a}_0^{-i}|s_0)) \right] q \\ &= \mathbb{E}_{s_0 \sim q} \left[ -\text{KL} \left( \rho^{-i}(a_0^{-i}|s_0) || \frac{\hat{\pi}^{-i}(\mathbf{a}_0^{-i}|s_0) \exp(\mathbb{E}_{\mathbf{a}_0^i \sim q} [Q_\rho^{-i}(s_0, \mathbf{a}_0; \rho)])}{\mathbb{E}_{\mathbf{a}_0^{-i} \sim \hat{\pi}^{-i}(\cdot|s_0)} [\exp(\mathbb{E}_{\mathbf{a}_0^i \sim q} [Q_\rho^{-i}(s_0, \mathbf{a}_0; \rho)])]} \right) \right] q + \mathbb{E}_{s_0, \mathbf{a}_0 \sim q} [Q_\rho^{-i}(s_0, \mathbf{a}_0; \rho)] \end{aligned}$$

From the non-negativity of KL divergence, the optimal opponent model of agent  $-i$  is

$$\rho^{-i,*}(\mathbf{a}^{-i}|s) = \frac{\hat{\pi}^{-i}(a^{-i}|s) \exp(\mathbb{E}_{\mathbf{a}^i \sim q} [Q_\rho^{-i}(s, \mathbf{a}; \rho)])}{\mathbb{E}_{\mathbf{a}^{-i} \sim \hat{\pi}^{-i}(\cdot|s)} [\exp(\mathbb{E}_{\mathbf{a}^i \sim q} [Q_\rho^{-i}(s, \mathbf{a}; \rho)])]}$$

$\square$

## B ALGORITHM

### B.1 OPPONENT MODELLING

---

#### Algorithm 3 Opponent modelling (OM)

---

**input** Initial the parameter of reward function  $\psi$ , trajectory replay buffer  $\mathcal{D}$ ,  
**for**  $i = 1, 2, \dots$  **do**  
    Sample trajectory  $\tau$  from  $\mathcal{D}$   
    **for**  $j = 1$  to  $N$  **do**  
        Update  $\hat{r}^j(s_t, \mathbf{a}_t)$  using (10)  
        Update  $\rho_j(\tau_j)$  using (6)  
    **end for**  
**end for**  
**output** optimised opponent model  $\rho$

---
